# Supplementary material for: Altitudinal Variation Influences Soil Fungal Community Composition and Diversity in Alpine–Gorge Region on the Eastern Qinghai–Tibetan Plateau
Source: MDPI journal article supplement (doi:10.3390/jof8080807), 2022-07-30
Supplement: s1 [file s1]

## Supplementary Material

Altitudinal Variation Influences Soil Fungal Community Composition and Diversity in Alpine-Gorge Region on the Eastern Qinghai-Tibetan Plateau

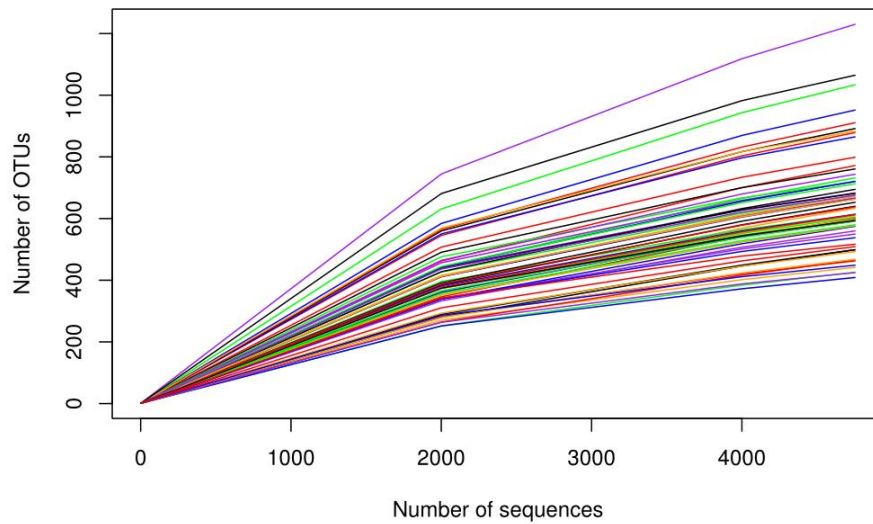

**Figure S1.** Rarefaction curve showing the sequence depth and observed OTUs.
